# Supplementary material for: Occupation and Educational Attainment Characteristics Associated With COVID-19 Mortality by Race and Ethnicity in California
Source: PubMed Central journal article supplement (PMC9034406; doi:10.1001/jamanetworkopen.2022.8406), 2022-04-22
Supplement: jamanetwopen-e228406-s001.pdf [file jamanetwopen-e228406-s001.pdf]

## Supplemental Online Content

Matthay EC, Duchowny KA, Riley AR, et al. Occupation and educational attainment characteristics associated with COVID-19 mortality by race and ethnicity in California. *JAMA Netw Open*. 2022;5(4):e228406. doi:10.1001/jamanetworkopen.2022.8406

**eTable 1.** Definition of California Regions

**eAppendix 1.** Occupational Measures

**eTable 2.** Occupation-Based Measures Associated With COVID-19 Exposure Risk

**eAppendix 2.** Occupation Code Crosswalks

**eAppendix 3.** Bootstrapped Confidence Intervals

**eTable 3.** Estimated Change in COVID-19 Mortality per 100 000 People When Setting Educational Attainment and Occupational Characteristics to (a) the Education and Occupational Distribution of White People of the Same Gender or (b) the Lowest-Risk Educational or Occupational Position, by Race, Ethnicity, and Gender, for Individuals Aged 18-65, California, January 1, 2020 to February 12, 2021

**eTable 4.** Demographic, Educational, and Occupational Characteristics of Study Population by Race and Ethnicity

**eTable 5.** Estimated COVID-19 Mortality Risks for Individuals Aged 18-65, per 100 000 Persons, by Race, Ethnicity, and Gender, if All Groups Had the Same Composition and Distribution of Occupational Characteristics as White People of the Same Gender, California, January 1, 2020 to February 12, 2021

**eTable 6.** Estimated COVID-19 Mortality Risks and Percent Change in Mortality Risk After Accounting for Racial and Ethnic Differences in Composition, Education, and Occupational Characteristics, for Individuals Aged 18-65, per 100 000 Persons, by Race, Ethnicity, and Gender, Sensitivity Analysis Results Based on Logistic Regression, California, January 1, 2020 to February 12, 2021

**eReferences**

This supplemental material has been provided by the authors to give readers additional information about their work.

**eTable 1: Definition of California Regions**

| <b>Region number</b> | <b>Counties included</b>                                                                                                                                     |
|----------------------|--------------------------------------------------------------------------------------------------------------------------------------------------------------|
| 1                    | Butte, Colusa, Del Norte, El Dorado, Glenn, Lassen, Modoc, Nevada, Placer, Plumas, Sacramento, Shasta, Sierra, Siskiyou, Sutter, Tehama, Trinity, Yolo, Yuba |
| 2                    | Humboldt, Lake, Mendocino, Napa, Sonoma                                                                                                                      |
| 3                    | Alameda, Contra Costa, Marin, San Francisco, San Mateo, Santa Clara, Solano                                                                                  |
| 4                    | Alpine, Amador, Calaveras, Madera, Mariposa, Merced, Mono, San Joaquin, Stanislaus, Tuolumne, Inyo                                                           |
| 5                    | Monterey, San Benito, San Luis Obispo, Santa Barbara, Santa Cruz, Ventura                                                                                    |
| 6                    | Fresno, Kern, Kings, Tulare                                                                                                                                  |
| 7                    | Riverside, San Bernardino                                                                                                                                    |
| 8                    | Los Angeles                                                                                                                                                  |
| 9                    | Orange                                                                                                                                                       |
| 10                   | Imperial, San Diego                                                                                                                                          |

## **eAppendix 1: Occupational Measures**

We characterized occupations using multiple measures hypothesized to be related to SARS-CoV-2 exposure risk (Appendix Table 1). First, as in previous research,<sup>1</sup> a team of three researchers manually categorized the 529 unique 2010 Census occupation codes into 9 occupational sectors based on the California official definition of essential work<sup>2</sup> and retail work. The categories were: facilities, food/agriculture, government/community, health/emergency, manufacturing, retail, transportation/logistics, not essential, and unemployed/not in labor force/missing.

Second, we used the O\*NET database to link occupation codes to characteristics of each occupation. Overseen by the Bureau of Labor statistics, O\*NET is based on surveys completed by employees, employers, and job experts, and includes measures of required knowledge and skills, typical tasks, exposures encountered, and the workplace environment for nearly 1,000 occupations. We used 13 O\*NET measures deemed relevant to COVID-19 exposure risk in previous research<sup>3-6</sup>—for example, the importance of assisting and caring for others, or the importance of working with computers (Appendix Table 2). We also considered Dingel and Neiman’s classification of which jobs can be done at home during the COVID-19 pandemic (telework), which was based on a composite of O\*NET measures.<sup>5</sup>

Third, individuals with lower incomes have less ability to not work or forgo income when faced with undesired COVID-19 exposure risk. We therefore characterized mean, median, 10<sup>th</sup>, 25<sup>th</sup>, 75<sup>th</sup>, and 90<sup>th</sup> percentiles of annual and hourly wages within each occupation code, based on the Bureau of Labor Statistics May 2019 report of wages for each occupation code. To merge the O\*NET, telework, and wages measures to the death and population data, we used multiple available crosswalks from the occupational coding schemes used in each source to 2010 Census occupation codes (see Appendix “Occupation code crosswalks”).

In our presentation of the results, we focus on the occupational measures of essential sector, telework, and median annual wages, because within the three major categories of measures (sector, O\*NET-based measures, and wages) these measures were the strongest predictors of COVID-19 death in the study population. Results for the remaining occupational measures are presented in Appendix Table 5.

**eTable 2: Occupation-Based Measures Related to COVID-19 Exposure Risk**

| Source                                                                                  | Measure                                                                                                                                     | Description                                                                                                                                                                                                                                                                                                                             |
|-----------------------------------------------------------------------------------------|---------------------------------------------------------------------------------------------------------------------------------------------|-----------------------------------------------------------------------------------------------------------------------------------------------------------------------------------------------------------------------------------------------------------------------------------------------------------------------------------------|
| California official essential worker designations <sup>1</sup>                          | 9 categories of essential and non-essential worker                                                                                          | Facilities, food/agriculture, government/community, health/emergency, manufacturing, retail, transportation/logistics, not essential, and unemployed/missing                                                                                                                                                                            |
| Dingel and Neiman, 2020 <sup>5</sup>                                                    | Telework                                                                                                                                    | Classification (0/1) of feasibility of working from home for each occupation. Composite measure based on 15 O*NET job measures.                                                                                                                                                                                                         |
| Bureau of Labor Statistics May 2019 National Occupational Employment and Wage Estimates | Mean, median, 10th, 25th, 75th, and 90th percentiles of annual wages; Mean, median, 10th, 25th, 75th, and 90th percentiles of hourly wages  | Estimates are produced by the Occupational Employment and Wage Statistics program and provide wage estimates annually for nearly 800 occupations. Estimates are calculated with data collected from employers in all industries in urban and rural areas nationwide.                                                                    |
| O*NET 2019 surveys of employees, employers, and job experts                             | Importance of assisting and caring for others                                                                                               | Work activities: Importance of “providing personal assistance, medical attention, emotional support, or other personal care to others such as coworkers, customers, or patients”. Examples of top ranking: Family medicine physicians, physical therapist assistants                                                                    |
|                                                                                         | Level of assisting and caring for others                                                                                                    | Work activities: Level of “providing personal assistance, medical attention, emotional support, or other personal care to others such as coworkers, customers, or patients”. Examples of top ranking: Nurse anesthetists, sports medicine physicians                                                                                    |
|                                                                                         | Contact with others                                                                                                                         | Work context: “How much does this job require the worker to be in contact with others (face-to-face, by telephone, or otherwise) in order to perform it?” Examples of top ranking: Allergists and immunologists, education and childcare administrators at preschools and daycares, receptionists and information clerks, telemarketers |
|                                                                                         | Physical proximity                                                                                                                          | Work context: “To what extent does this job require the worker to perform job tasks in close physical proximity to other people?” Examples of top ranking: acupuncturists, choreographers, dental hygienists, sports medicine physicians                                                                                                |
|                                                                                         | Deal with physically aggressive people                                                                                                      | Work context: “How frequently does this job require the worker to deal with physical aggression of violent individuals?” Examples of top ranking: First-line supervisors of correctional officers, correctional officers and jailers, police and sheriff’s patrol officers, psychiatric aides                                           |
|                                                                                         | Exposed to disease or infections                                                                                                            | Work context: “How often does this job require exposure to disease/infections?” Examples of top ranking: Acute care nurses, dental hygienists, general internal medicine physicians, general pediatricians                                                                                                                              |
|                                                                                         | Face-to-face discussions                                                                                                                    | Work context: “How often do you have to have face-to-face discussions with individuals or teams in this job?” Amusement and recreational attendants, buyers and purchasing agents of farm products, chief executives, electrical power-line installers and repairers, forest and conservation technicians, neurologists                 |
|                                                                                         | Importance of interacting with computers                                                                                                    | Work activities: Importance of “using computers and computer systems (including hardware and software) to program, write software, set up functions, enter data, or process information”. Examples of top ranking: Computer systems engineers/architects, radio frequency identification device specialists, database administrators    |
|                                                                                         | Level of interaction with computers                                                                                                         | Work activities: Level of “using computers and computer systems (including hardware and software) to program, write software, set up functions, enter data, or process information”. Examples of top ranking: Computer network architects, computer systems engineers/architects, database architects                                   |
|                                                                                         | Importance of performing for or working directly with the public                                                                            | Work activities: Importance of “performing for people or dealing directly with the public. This includes serving customers in restaurants and stores, and receiving clients or guests”. Examples of top ranking: Flight attendants, morticians/undertakers and funeral arrangers, demonstrators and product promoters                   |
|                                                                                         | Level of performing for or working directly with the public                                                                                 | Work activities: Level of “performing for people or dealing directly with the public. This includes serving customers in restaurants and stores, and receiving clients or guests”. Examples of top ranking: Prosthodontists, judges and magistrates, morticians/undertakers and funeral arrangers                                       |
|                                                                                         | Wear specialized protective or safety equipment such as breathing apparatus, safety harness, full protection suits, or radiation protection | Work context: “How much does this job require wearing specialized protective or safety equipment such as breathing apparatus, safety harness, full protection suits, or radiation protection?” Examples of top ranking: Fiberglass laminators and fabricators, wind turbine service technicians, hazardous materials removal workers    |
|                                                                                         | Work with group or team                                                                                                                     | Work context: “How important is it to work with others in a group or team in this job?” Examples of top ranking: Actors, family medicine physicians, airline pilots/copilots and flight engineers                                                                                                                                       |

## **eAppendix 2: Occupation Code Crosswalks**

### *Death and American Community Survey records*

Death records included open text fields for primary occupation and primary industry, described as “type of work done during most of working life”. We used the National Institute for Occupational Safety and Health’s Industry and Occupation Computerized Coding System, an automated machine-learning based system, to convert the open text fields for occupation and industry to standardized 2010 Census Codes (529 unique codes). To align the 2010 Census occupation codes in the death records with American Community Survey (ACS) which used 2018 Census occupation codes (570 unique codes), we used the Census crosswalk.<sup>7</sup> When two 2018 codes were assigned to the same 2010 code, we assigned them the same 2010 code. When one 2018 code was assigned to multiple 2010, we arbitrarily selected the first, recognizing that the ultimate occupational measures used in the analysis (telework, wages, etc.) would not distinguish between these sub-categories.

### *O\*NET data*

To merge the O\*NET data to the death/ACS data, we applied multiple crosswalks: from 2019 O\*NET SOC codes (1016 unique codes) to 2018 SOC codes (867 unique codes),<sup>8</sup> then from 2018 SOC codes to 2010 SOC codes (840 unique codes),<sup>9</sup> then from 2010 SOC codes to 2010 Census codes (529 unique codes).<sup>7</sup> At each stage, we applied the same procedures as above to assign codes that split or combined when transitioning from one coding scheme to the next.

### *Telework data*

To merge the Dingel and Neiman telework data to the death/ACS data, we applied multiple crosswalks: from 2010 O\*NET SOC codes (1110 unique codes) to 2010 SOC codes (840 unique codes),<sup>10</sup> then from 2010 SOC codes to 2010 Census codes (529 unique codes).<sup>7</sup> At each stage, we applied the same procedures to assign codes that split or combined when transitioning from one coding scheme to the next.

### *Wages data*

To merge the US Bureau of Labor Statistics telework data to the death/ACS data, we applied multiple crosswalks: from the OES hybrid SOC coding scheme (824 unique codes) to 2010 SOC codes (840 unique codes),<sup>11</sup> then from 2010 SOC codes to 2010 Census codes (529 unique codes).<sup>7</sup> At each stage, we applied the same procedures to assign codes that split or combined when transitioning from one coding scheme to the next.

### **eAppendix 3: Bootstrapped Confidence Intervals**

Confidence intervals were generating using the nonparametric bootstrap.<sup>12</sup> The analytic data were at the stratum-level with weights corresponding the number of people represented in each row, but the relevant unit of analysis was the person. Thus, to create each bootstrapped dataset, we expanded the analytic data by duplicating each row by the number of persons represented by that row, then sampled rows with replacement from the expanded dataset, and collapsed back to the stratum level for analysis.

Because the data represented 25 million people and were stored on a secure server with limited computational capacity, it was not feasible to bootstrap the data extensively (e.g. 10,000 times). We tested small numbers of bootstraps incrementally (5, 10, 20, 40, 80, 100, 125, 150) and defined convergence of the standard errors of the parameter estimates as the point at which the absolute value of the change in the SE estimate was less than 0.5, where 0.5 was selected as an amount below which there would be no difference in the substantive implications of the results. In practice, this level of convergence was achieved for all parameters after 125 bootstraps.

**eTable 3: Estimated Change in COVID-19 Mortality per 100,000 People When Setting Educational Attainment and Occupational Characteristics to (a) the Education and Occupational Distribution of White People of the Same Gender or (b) the Lowest-Risk Educational or Occupational Position, by Race, Ethnicity, and Gender, for Individuals Aged 18-65, California, January 1, 2020-February 12, 2021**

| Mediator                               | Race/ethnicity | Change in COVID-19 mortality, if all individuals had the educational attainment and occupational characteristics of White people of the same gender (95% CI) |                | Change in COVID-19 mortality, if all individuals held the lowest-risk educational and occupational position (95% CI) |                |
|----------------------------------------|----------------|--------------------------------------------------------------------------------------------------------------------------------------------------------------|----------------|----------------------------------------------------------------------------------------------------------------------|----------------|
|                                        |                | Men                                                                                                                                                          | Women          | Men                                                                                                                  | Women          |
| Education                              | Asian          | 6 (5, 7)                                                                                                                                                     | 3 (2, 4)       | -10 (-14, -6)                                                                                                        | -4 (-6, -2)    |
|                                        | Black          | -10 (-12, -7)                                                                                                                                                | -4 (-6, -2)    | -41 (-50, -31)                                                                                                       | -19 (-26, -12) |
|                                        | Latinx         | -24 (-27, -22)                                                                                                                                               | -16 (-17, -14) | -56 (-62, -49)                                                                                                       | -35 (-38, -31) |
|                                        | White          | (ref)                                                                                                                                                        | (ref)          | -11 (-13, -10)                                                                                                       | -9 (-10, -8)   |
|                                        | Other          | -6 (-8, -4)                                                                                                                                                  | -4 (-5, -2)    | -34 (-44, -23)                                                                                                       | -23 (-30, -17) |
| Essential sector                       | Asian          | -1 (-2, 1)                                                                                                                                                   | -1 (-2, 0)     | -9 (-14, -4)                                                                                                         | -1 (-4, 2)     |
|                                        | Black          | 9 (6, 12)                                                                                                                                                    | 1 (0, 2)       | 8 (-3, 19)                                                                                                           | -3 (-10, 5)    |
|                                        | Latinx         | -13 (-14, -11)                                                                                                                                               | -2 (-2, -1)    | -38 (-44, -32)                                                                                                       | -11 (-15, -8)  |
|                                        | White          | (ref)                                                                                                                                                        | (ref)          | -10 (-12, -8)                                                                                                        | -2 (-4, -1)    |
|                                        | Other          | -1 (-3, 0)                                                                                                                                                   | 0 (-1, 0)      | -23 (-33, -14)                                                                                                       | -7 (-14, 1)    |
| Not Telework                           | Asian          | -1 (-2, -1)                                                                                                                                                  | 0 (0, 0)       | -7 (-12, -3)                                                                                                         | 0 (-2, 3)      |
|                                        | Black          | 10 (7, 12)                                                                                                                                                   | 1 (0, 2)       | 15 (5, 24)                                                                                                           | 3 (-3, 9)      |
|                                        | Latinx         | -9 (-10, -8)                                                                                                                                                 | -2 (-3, -2)    | -23 (-28, -18)                                                                                                       | -11 (-14, -8)  |
|                                        | White          | (ref)                                                                                                                                                        | (ref)          | -8 (-10, -6)                                                                                                         | -2 (-4, -1)    |
|                                        | Other          | -1 (-3, 0)                                                                                                                                                   | -1 (-1, 0)     | -11 (-20, -2)                                                                                                        | -9 (-14, -3)   |
| Annual wage                            | Asian          | 0 (-1, 0)                                                                                                                                                    | 0 (0, 1)       | -13 (-18, -7)                                                                                                        | -3 (-7, 1)     |
|                                        | Black          | 2 (-2, 5)                                                                                                                                                    | 2 (0, 3)       | -5 (-20, 11)                                                                                                         | 16 (-1, 32)    |
|                                        | Latinx         | -13 (-15, -11)                                                                                                                                               | -4 (-5, -3)    | -38 (-46, -29)                                                                                                       | -24 (-31, -17) |
|                                        | White          | (ref)                                                                                                                                                        | (ref)          | -9 (-12, -7)                                                                                                         | -4 (-6, -2)    |
|                                        | Other          | -2 (-4, 0)                                                                                                                                                   | -1 (-2, 0)     | -28 (-39, -16)                                                                                                       | -6 (-18, 6)    |
| All occupational factors               | Asian          | 0 (-2, 2)                                                                                                                                                    | -1 (-2, 0)     | -15 (-21, -9)                                                                                                        | -7 (-12, -3)   |
|                                        | Black          | 1 (-4, 6)                                                                                                                                                    | -1 (-3, 2)     | -10 (-28, 9)                                                                                                         | 10 (-8, 28)    |
|                                        | Latinx         | -18 (-20, -15)                                                                                                                                               | -5 (-6, -3)    | -55 (-64, -46)                                                                                                       | -28 (-36, -20) |
|                                        | White          | (ref)                                                                                                                                                        | (ref)          | -13 (-16, -10)                                                                                                       | -6 (-9, -4)    |
|                                        | Other          | -2 (-4, 0)                                                                                                                                                   | -2 (-3, -1)    | -35 (-49, -21)                                                                                                       | -10 (-22, 3)   |
| Education and all occupational factors | Asian          | 6 (4, 8)                                                                                                                                                     | 3 (2, 4)       | -18 (-25, -12)                                                                                                       | -10 (-14, -5)  |
|                                        | Black          | 0 (-4, 4)                                                                                                                                                    | -3 (-6, -1)    | -22 (-39, -6)                                                                                                        | -4 (-22, 14)   |
|                                        | Latinx         | -31 (-34, -28)                                                                                                                                               | -16 (-18, -15) | -75 (-85, -66)                                                                                                       | -48 (-54, -42) |
|                                        | White          | (ref)                                                                                                                                                        | (ref)          | -17 (-20, -13)                                                                                                       | -12 (-15, -9)  |
|                                        | Other          | -3 (-6, -1)                                                                                                                                                  | -4 (-5, -3)    | -42 (-56, -28)                                                                                                       | -23 (-35, -10) |

Legend: “Other” race and ethnicity includes American Indian, Alaskan Native, Native Hawaiians, other Pacific Islanders, multi-race, and unspecified (all non-Latinx). All models are adjusted for age group, USA nativity, and California region of residence. Risk differences were calculated by comparing the composition-adjusted COVID-19 mortality risk (the COVID-19 mortality risk if all racial/ethnic groups had the same distribution of covariates as Whites) to the

composition- and mediator-adjusted COVID-19 mortality risk (the COVID-19 mortality risk if all racial/ethnic groups had the same distribution of covariates and education/occupation mediator(s) as Whites, or the COVID-19 mortality risk if all individuals held the safest educational and/or occupational position [Bachelor's degree or higher, non-essential, telework-able, highest quintile of median annual wages]).



**eTable 4: Demographic, Educational, and Occupational Characteristics of Study Population by Race and Ethnicity**

|                                    | Asian     |      | Black     |      | Latinx    |      | White     |      | Other   |      |
|------------------------------------|-----------|------|-----------|------|-----------|------|-----------|------|---------|------|
|                                    | N         | %    | N         | %    | N         | %    | N         | %    | N       | %    |
| Persons                            | 3,925,494 | 16%  | 1,472,151 | 6%   | 9,859,259 | 39%  | 9,040,379 | 36%  | 937,809 | 4%   |
| COVID-19 death                     |           |      |           |      |           |      |           |      |         |      |
| No                                 | 3,924,376 | 100% | 1,471,185 | 100% | 9,849,030 | 100% | 9,038,381 | 100% | 937,337 | 100% |
| Yes                                | 1,118     | 0%   | 966       | 0%   | 10,229    | 0%   | 1,998     | 0%   | 472     | 0%   |
| Age (years)                        |           |      |           |      |           |      |           |      |         |      |
| 18-24                              | 472,163   | 12%  | 226,881   | 15%  | 1,799,211 | 18%  | 1,017,420 | 11%  | 172,745 | 18%  |
| 25-44                              | 1,818,665 | 46%  | 639,966   | 43%  | 4,717,922 | 48%  | 3,702,330 | 41%  | 468,423 | 50%  |
| 45-65                              | 1,634,666 | 42%  | 605,304   | 41%  | 3,342,126 | 34%  | 4,320,629 | 48%  | 296,641 | 32%  |
| Gender                             |           |      |           |      |           |      |           |      |         |      |
| Women                              | 2,063,142 | 53%  | 723,166   | 49%  | 4,852,961 | 49%  | 4,407,412 | 49%  | 468,250 | 50%  |
| Men                                | 1,862,352 | 47%  | 748,985   | 51%  | 5,006,298 | 51%  | 4,632,967 | 51%  | 469,559 | 50%  |
| Foreign-born                       |           |      |           |      |           |      |           |      |         |      |
| No                                 | 1,181,970 | 30%  | 1,319,700 | 90%  | 5,576,110 | 57%  | 8,078,201 | 89%  | 773,811 | 83%  |
| Yes                                | 2,743,509 | 70%  | 152,429   | 10%  | 4,283,083 | 43%  | 962,108   | 11%  | 163,934 | 17%  |
| Missing                            | 15        | 0%   | 22        | 0%   | 66        | 0%   | 70        | 0%   | 64      | 0%   |
| Educational attainment             |           |      |           |      |           |      |           |      |         |      |
| No high school degree and no GED   | 295,891   | 8%   | 136,774   | 9%   | 2,726,451 | 28%  | 402,555   | 4%   | 71,527  | 8%   |
| High school degree or GED          | 536,599   | 14%  | 369,080   | 25%  | 2,815,628 | 29%  | 1,676,499 | 19%  | 196,998 | 21%  |
| Some college or Associate's degree | 946,735   | 24%  | 592,886   | 40%  | 2,993,868 | 30%  | 3,006,774 | 33%  | 342,069 | 36%  |
| Bachelor's degree or beyond        | 2,146,241 | 55%  | 373,367   | 25%  | 1,322,962 | 13%  | 3,954,439 | 44%  | 327,154 | 35%  |
| Missing                            | 28        | 0%   | 44        | 0%   | 350       | 0%   | 112       | 0%   | 61      | 0%   |
| Worker sector                      |           |      |           |      |           |      |           |      |         |      |
| Facilities                         | 169,041   | 4%   | 81,139    | 6%   | 1,508,582 | 15%  | 733,589   | 8%   | 69,032  | 7%   |
| Food and agriculture               | 235,104   | 6%   | 63,386    | 4%   | 1,065,046 | 11%  | 466,679   | 5%   | 58,329  | 6%   |
| Government and community           | 303,395   | 8%   | 166,907   | 11%  | 748,296   | 8%   | 1,000,243 | 11%  | 94,959  | 10%  |
| Health or emergency                | 440,885   | 11%  | 163,842   | 11%  | 602,333   | 6%   | 733,815   | 8%   | 84,654  | 9%   |
| Manufacturing                      | 175,261   | 4%   | 33,570    | 2%   | 616,232   | 6%   | 302,820   | 3%   | 29,690  | 3%   |
| Retail                             | 199,368   | 5%   | 99,151    | 7%   | 720,072   | 7%   | 501,385   | 6%   | 63,657  | 7%   |
| Transportation and logistics       | 177,834   | 5%   | 145,460   | 10%  | 957,648   | 10%  | 455,806   | 5%   | 68,379  | 7%   |
| Not essential                      | 1,623,780 | 41%  | 386,578   | 26%  | 1,889,471 | 19%  | 3,582,906 | 40%  | 322,266 | 34%  |
| Unemployed or missing              | 600,826   | 15%  | 332,118   | 23%  | 1,751,579 | 18%  | 1,263,136 | 14%  | 146,843 | 16%  |
| Telework-able occupation           |           |      |           |      |           |      |           |      |         |      |
| Yes                                | 1,683,540 | 43%  | 484,019   | 33%  | 2,262,639 | 23%  | 4,159,608 | 46%  | 368,002 | 39%  |
| No                                 | 1,582,613 | 40%  | 625,829   | 43%  | 5,716,117 | 58%  | 3,444,972 | 38%  | 404,135 | 43%  |
| Unemployed/not in labor force      | 600,826   | 15%  | 332,118   | 23%  | 1,751,573 | 18%  | 1,263,135 | 14%  | 146,843 | 16%  |
| Missing                            | 58,515    | 1%   | 30,185    | 2%   | 128,930   | 1%   | 172,664   | 2%   | 18,829  | 2%   |
| Median annual wage for occupation  |           |      |           |      |           |      |           |      |         |      |
| \$22,200 – 29,000                  | 583,668   | 15%  | 275,161   | 19%  | 2,544,448 | 26%  | 1,151,490 | 13%  | 167,442 | 18%  |
| \$29,001 – 39,100                  | 477,281   | 12%  | 294,545   | 20%  | 2,065,638 | 21%  | 1,136,431 | 13%  | 156,869 | 17%  |
| \$39,101 – 51,700                  | 521,040   | 13%  | 201,257   | 14%  | 1,644,828 | 17%  | 1,442,786 | 16%  | 139,735 | 15%  |

|                               |           |     |         |     |           |     |           |     |         |     |
|-------------------------------|-----------|-----|---------|-----|-----------|-----|-----------|-----|---------|-----|
| \$51,701 – 73,800             | 666,910   | 17% | 203,665 | 14% | 1,104,127 | 11% | 1,839,359 | 20% | 155,091 | 17% |
| \$73,800 +                    | 1,048,661 | 27% | 147,163 | 10% | 712,908   | 7%  | 2,124,201 | 23% | 164,032 | 17% |
| Unemployed/not in labor force | 600,826   | 15% | 332,118 | 23% | 1,751,573 | 18% | 1,263,135 | 14% | 146,843 | 16% |
| Missing                       | 27,108    | 1%  | 18,242  | 1%  | 35,737    | 0%  | 82,977    | 1%  | 7,797   | 1%  |

Legend: “Other” race and ethnicity includes American Indian, Alaskan Native, Native Hawaiians, other Pacific Islanders, multi-race, and unspecified (all non-Latinx).

**eTable 5: Estimated COVID-19 Mortality Risks for Individuals Aged 18-65, per 100,000 Persons, by Race, Ethnicity, and Gender, if All Groups Had the Same Composition and Distribution of Occupational Characteristics as White People of the Same Gender, California, January 1, 2020-February 12, 2021**

| Occupational measure (mediator)                                  | Race/ethnicity | Men                           |                                             | Women                         |                                             |
|------------------------------------------------------------------|----------------|-------------------------------|---------------------------------------------|-------------------------------|---------------------------------------------|
|                                                                  |                | Composition-adjusted (95% CI) | Composition- and mediator-adjusted (95% CI) | Composition-adjusted (95% CI) | Composition- and mediator-adjusted (95% CI) |
| Importance of assisting and caring for others                    | Asian          | 27 (21, 33)                   | 26 (20, 33)                                 | 13 (9, 16)                    | 14 (10, 17)                                 |
|                                                                  | Black          | 87 (79, 95)                   | 101 (92, 110)                               | 51 (44, 58)                   | 52 (45, 59)                                 |
|                                                                  | Latinx         | 142 (137, 147)                | 145 (140, 150)                              | 70 (66, 74)                   | 70 (66, 74)                                 |
|                                                                  | White          | (ref)                         | (ref)                                       | (ref)                         | (ref)                                       |
|                                                                  | Other          | 84 (74, 94)                   | 87 (77, 98)                                 | 46 (36, 56)                   | 46 (37, 56)                                 |
| Level of assisting and caring for others                         | Asian          | 27 (21, 34)                   | 26 (20, 33)                                 | 13 (10, 16)                   | 14 (10, 17)                                 |
|                                                                  | Black          | 87 (79, 95)                   | 100 (91, 109)                               | 51 (44, 58)                   | 52 (45, 59)                                 |
|                                                                  | Latinx         | 142 (136, 148)                | 142 (137, 148)                              | 70 (66, 73)                   | 69 (66, 73)                                 |
|                                                                  | White          | (ref)                         | (ref)                                       | (ref)                         | (ref)                                       |
|                                                                  | Other          | 84 (73, 94)                   | 87 (76, 97)                                 | 46 (38, 54)                   | 46 (38, 54)                                 |
| Contact with others                                              | Asian          | 27 (21, 33)                   | 27 (20, 33)                                 | 13 (9, 16)                    | 14 (10, 17)                                 |
|                                                                  | Black          | 87 (78, 95)                   | 99 (89, 109)                                | 51 (44, 58)                   | 54 (47, 61)                                 |
|                                                                  | Latinx         | 142 (137, 147)                | 143 (138, 148)                              | 70 (66, 74)                   | 68 (64, 72)                                 |
|                                                                  | White          | (ref)                         | (ref)                                       | (ref)                         | (ref)                                       |
|                                                                  | Other          | 84 (74, 94)                   | 87 (77, 98)                                 | 46 (37, 55)                   | 46 (37, 55)                                 |
| Physical proximity                                               | Asian          | 27 (21, 33)                   | 26 (20, 32)                                 | 13 (9, 17)                    | 12 (8, 16)                                  |
|                                                                  | Black          | 87 (78, 96)                   | 97 (87, 107)                                | 51 (44, 58)                   | 53 (46, 60)                                 |
|                                                                  | Latinx         | 142 (138, 147)                | 143 (138, 147)                              | 70 (66, 73)                   | 69 (65, 73)                                 |
|                                                                  | White          | (ref)                         | (ref)                                       | (ref)                         | (ref)                                       |
|                                                                  | Other          | 83 (73, 94)                   | 85 (74, 96)                                 | 46 (37, 55)                   | 46 (36, 55)                                 |
| Deal with physically aggressive people                           | Asian          | 28 (22, 34)                   | 26 (20, 33)                                 | 13 (9, 16)                    | 13 (10, 17)                                 |
|                                                                  | Black          | 87 (77, 96)                   | 98 (87, 108)                                | 50 (44, 57)                   | 50 (43, 57)                                 |
|                                                                  | Latinx         | 142 (137, 148)                | 144 (138, 150)                              | 70 (66, 74)                   | 69 (65, 73)                                 |
|                                                                  | White          | (ref)                         | (ref)                                       | (ref)                         | (ref)                                       |
|                                                                  | Other          | 84 (73, 94)                   | 85 (75, 96)                                 | 46 (38, 54)                   | 45 (37, 54)                                 |
| Exposed to disease or infections                                 | Asian          | 30 (23, 37)                   | 28 (21, 35)                                 | 13 (10, 17)                   | 14 (10, 17)                                 |
|                                                                  | Black          | 88 (78, 97)                   | 101 (90, 112)                               | 51 (44, 58)                   | 52 (45, 58)                                 |
|                                                                  | Latinx         | 142 (137, 147)                | 144 (139, 150)                              | 70 (66, 74)                   | 69 (65, 73)                                 |
|                                                                  | White          | (ref)                         | (ref)                                       | (ref)                         | (ref)                                       |
|                                                                  | Other          | 86 (75, 97)                   | 91 (79, 102)                                | 47 (39, 55)                   | 47 (39, 56)                                 |
| Face-to-face discussions                                         | Asian          | 27 (21, 34)                   | 27 (20, 33)                                 | 13 (9, 16)                    | 12 (9, 16)                                  |
|                                                                  | Black          | 87 (78, 95)                   | 97 (87, 106)                                | 51 (45, 57)                   | 52 (45, 58)                                 |
|                                                                  | Latinx         | 142 (137, 147)                | 143 (138, 148)                              | 70 (66, 73)                   | 68 (65, 72)                                 |
|                                                                  | White          | (ref)                         | (ref)                                       | (ref)                         | (ref)                                       |
|                                                                  | Other          | 84 (73, 95)                   | 87 (76, 98)                                 | 46 (38, 54)                   | 46 (37, 54)                                 |
| Importance of interacting with computers                         | Asian          | 28 (21, 34)                   | 28 (21, 34)                                 | 13 (10, 16)                   | 13 (10, 16)                                 |
|                                                                  | Black          | 86 (77, 95)                   | 93 (83, 102)                                | 50 (43, 58)                   | 51 (43, 58)                                 |
|                                                                  | Latinx         | 142 (137, 147)                | 132 (127, 138)                              | 70 (66, 73)                   | 67 (63, 71)                                 |
|                                                                  | White          | (ref)                         | (ref)                                       | (ref)                         | (ref)                                       |
|                                                                  | Other          | 83 (72, 95)                   | 82 (71, 93)                                 | 46 (38, 54)                   | 46 (38, 54)                                 |
| Level of interaction with computers                              | Asian          | 26 (20, 32)                   | 26 (21, 32)                                 | 12 (8, 16)                    | 12 (8, 16)                                  |
|                                                                  | Black          | 85 (77, 93)                   | 93 (83, 102)                                | 48 (41, 55)                   | 49 (42, 56)                                 |
|                                                                  | Latinx         | 142 (137, 148)                | 136 (130, 142)                              | 67 (63, 71)                   | 65 (61, 69)                                 |
|                                                                  | White          | (ref)                         | (ref)                                       | (ref)                         | (ref)                                       |
|                                                                  | Other          | 85 (74, 97)                   | 85 (73, 96)                                 | 44 (35, 54)                   | 44 (34, 53)                                 |
| Importance of performing for or working directly with the public | Asian          | 27 (21, 34)                   | 27 (21, 34)                                 | 13 (9, 17)                    | 13 (9, 17)                                  |
|                                                                  | Black          | 87 (78, 96)                   | 99 (89, 109)                                | 51 (45, 57)                   | 53 (46, 59)                                 |
|                                                                  | Latinx         | 142 (137, 148)                | 142 (137, 148)                              | 70 (66, 74)                   | 69 (65, 73)                                 |
|                                                                  | White          | (ref)                         | (ref)                                       | (ref)                         | (ref)                                       |
|                                                                  | Other          | 84 (73, 95)                   | 88 (76, 99)                                 | 46 (37, 55)                   | 46 (38, 55)                                 |
| Level of performing for or working directly with the public      | Asian          | 27 (21, 34)                   | 28 (21, 35)                                 | 13 (9, 16)                    | 13 (10, 17)                                 |
|                                                                  | Black          | 86 (78, 95)                   | 99 (89, 108)                                | 51 (44, 59)                   | 53 (45, 61)                                 |
|                                                                  | Latinx         | 140 (134, 145)                | 140 (135, 145)                              | 70 (67, 74)                   | 70 (66, 73)                                 |
|                                                                  | White          | (ref)                         | (ref)                                       | (ref)                         | (ref)                                       |
|                                                                  | Other          | 82 (71, 92)                   | 85 (74, 96)                                 | 46 (36, 55)                   | 46 (36, 55)                                 |

|                                                                                                                                             |        |                |                |             |             |
|---------------------------------------------------------------------------------------------------------------------------------------------|--------|----------------|----------------|-------------|-------------|
| Wear specialized protective or safety equipment such as breathing apparatus, safety harness, full protection suits, or radiation protection | Asian  | 28 (22, 35)    | 29 (22, 35)    | 14 (10, 18) | 13 (9, 17)  |
|                                                                                                                                             | Black  | 92 (82, 102)   | 109 (97, 121)  | 51 (43, 59) | 52 (44, 60) |
|                                                                                                                                             | Latinx | 144 (138, 150) | 144 (138, 150) | 72 (67, 76) | 71 (66, 75) |
|                                                                                                                                             | White  | (ref)          | (ref)          | (ref)       | (ref)       |
|                                                                                                                                             | Other  | 86 (74, 98)    | 88 (76, 101)   | 47 (37, 56) | 46 (36, 56) |
| Work with group or team                                                                                                                     | Asian  | 27 (21, 33)    | 27 (21, 33)    | 13 (9, 16)  | 13 (9, 16)  |
|                                                                                                                                             | Black  | 87 (78, 95)    | 96 (87, 105)   | 51 (44, 58) | 54 (47, 61) |
|                                                                                                                                             | Latinx | 142 (137, 147) | 139 (134, 144) | 70 (66, 74) | 69 (65, 73) |
|                                                                                                                                             | White  | (ref)          | (ref)          | (ref)       | (ref)       |
|                                                                                                                                             | Other  | 84 (73, 95)    | 86 (74, 98)    | 46 (37, 55) | 46 (36, 56) |
| Hourly wages: mean                                                                                                                          | Asian  | 27 (22, 32)    | 27 (22, 33)    | 13 (9, 18)  | 14 (10, 18) |
|                                                                                                                                             | Black  | 87 (79, 96)    | 90 (80, 99)    | 51 (44, 59) | 53 (45, 60) |
|                                                                                                                                             | Latinx | 143 (137, 149) | 131 (125, 137) | 71 (67, 75) | 67 (64, 71) |
|                                                                                                                                             | White  | (ref)          | (ref)          | (ref)       | (ref)       |
|                                                                                                                                             | Other  | 83 (73, 94)    | 81 (71, 92)    | 46 (37, 54) | 45 (36, 53) |
| Hourly wages: 10 <sup>th</sup> percentile                                                                                                   | Asian  | 27 (22, 33)    | 28 (22, 34)    | 13 (10, 17) | 14 (10, 18) |
|                                                                                                                                             | Black  | 87 (79, 95)    | 89 (81, 98)    | 51 (44, 58) | 54 (46, 61) |
|                                                                                                                                             | Latinx | 143 (138, 148) | 131 (126, 136) | 71 (67, 75) | 68 (64, 72) |
|                                                                                                                                             | White  | (ref)          | (ref)          | (ref)       | (ref)       |
|                                                                                                                                             | Other  | 83 (73, 93)    | 82 (72, 91)    | 46 (37, 55) | 46 (37, 54) |
| Hourly wages: 25 <sup>th</sup> percentile                                                                                                   | Asian  | 27 (21, 33)    | 27 (21, 33)    | 14 (9, 18)  | 14 (10, 18) |
|                                                                                                                                             | Black  | 88 (79, 97)    | 89 (80, 99)    | 52 (44, 59) | 53 (45, 61) |
|                                                                                                                                             | Latinx | 144 (138, 150) | 132 (126, 138) | 71 (68, 75) | 68 (64, 72) |
|                                                                                                                                             | White  | (ref)          | (ref)          | (ref)       | (ref)       |
|                                                                                                                                             | Other  | 84 (74, 94)    | 82 (72, 92)    | 47 (37, 56) | 46 (36, 55) |
| Hourly wages: Median                                                                                                                        | Asian  | 27 (22, 33)    | 27 (22, 33)    | 13 (10, 17) | 14 (10, 18) |
|                                                                                                                                             | Black  | 87 (79, 95)    | 90 (81, 99)    | 51 (44, 58) | 53 (45, 61) |
|                                                                                                                                             | Latinx | 143 (138, 148) | 132 (126, 137) | 71 (67, 75) | 67 (63, 71) |
|                                                                                                                                             | White  | (ref)          | (ref)          | (ref)       | (ref)       |
|                                                                                                                                             | Other  | 83 (73, 93)    | 82 (72, 91)    | 46 (37, 55) | 45 (37, 54) |
| Hourly wages: 75 <sup>th</sup> percentile                                                                                                   | Asian  | 27 (22, 32)    | 27 (22, 33)    | 13 (9, 18)  | 14 (10, 18) |
|                                                                                                                                             | Black  | 87 (79, 96)    | 89 (80, 98)    | 51 (44, 59) | 53 (45, 60) |
|                                                                                                                                             | Latinx | 143 (137, 149) | 131 (125, 137) | 71 (67, 75) | 67 (64, 71) |
|                                                                                                                                             | White  | (ref)          | (ref)          | (ref)       | (ref)       |
|                                                                                                                                             | Other  | 83 (73, 94)    | 81 (70, 91)    | 46 (37, 54) | 45 (36, 53) |
| Hourly wages: 90 <sup>th</sup> percentile                                                                                                   | Asian  | 27 (22, 32)    | 27 (21, 32)    | 13 (9, 18)  | 14 (10, 18) |
|                                                                                                                                             | Black  | 87 (79, 96)    | 91 (82, 100)   | 51 (44, 59) | 53 (45, 60) |
|                                                                                                                                             | Latinx | 143 (137, 149) | 131 (125, 137) | 71 (67, 75) | 67 (64, 71) |
|                                                                                                                                             | White  | (ref)          | (ref)          | (ref)       | (ref)       |
|                                                                                                                                             | Other  | 83 (73, 94)    | 81 (71, 92)    | 46 (37, 54) | 45 (36, 53) |
| Annual wages: mean                                                                                                                          | Asian  | 27 (21, 34)    | 27 (21, 34)    | 14 (10, 18) | 14 (10, 18) |
|                                                                                                                                             | Black  | 87 (78, 96)    | 88 (79, 98)    | 51 (45, 58) | 52 (45, 59) |
|                                                                                                                                             | Latinx | 142 (136, 147) | 128 (123, 134) | 71 (67, 75) | 67 (62, 71) |
|                                                                                                                                             | White  | (ref)          | (ref)          | (ref)       | (ref)       |
|                                                                                                                                             | Other  | 83 (72, 94)    | 80 (70, 91)    | 44 (35, 53) | 43 (34, 52) |
| Annual wages: 10 <sup>th</sup> percentile                                                                                                   | Asian  | 28 (22, 33)    | 28 (23, 34)    | 14 (11, 17) | 14 (11, 18) |
|                                                                                                                                             | Black  | 87 (79, 95)    | 89 (80, 98)    | 51 (44, 58) | 53 (45, 60) |
|                                                                                                                                             | Latinx | 141 (136, 147) | 130 (124, 135) | 70 (66, 74) | 67 (63, 71) |
|                                                                                                                                             | White  | (ref)          | (ref)          | (ref)       | (ref)       |
|                                                                                                                                             | Other  | 82 (72, 93)    | 81 (70, 92)    | 45 (36, 53) | 44 (35, 53) |
| Annual wages: 25 <sup>th</sup> percentile                                                                                                   | Asian  | 28 (21, 34)    | 28 (21, 34)    | 14 (10, 18) | 14 (11, 18) |
|                                                                                                                                             | Black  | 87 (78, 96)    | 89 (78, 100)   | 52 (44, 59) | 52 (45, 60) |
|                                                                                                                                             | Latinx | 142 (137, 148) | 130 (125, 135) | 71 (67, 75) | 67 (63, 71) |
|                                                                                                                                             | White  | (ref)          | (ref)          | (ref)       | (ref)       |
|                                                                                                                                             | Other  | 84 (73, 95)    | 82 (71, 92)    | 45 (37, 53) | 44 (36, 52) |
| Annual wages: 75 <sup>th</sup> percentile                                                                                                   | Asian  | 27 (21, 34)    | 27 (21, 34)    | 14 (10, 18) | 14 (10, 18) |
|                                                                                                                                             | Black  | 87 (78, 96)    | 88 (78, 97)    | 51 (45, 58) | 52 (45, 59) |
|                                                                                                                                             | Latinx | 142 (136, 147) | 129 (123, 134) | 71 (67, 75) | 67 (62, 71) |
|                                                                                                                                             | White  | (ref)          | (ref)          | (ref)       | (ref)       |
|                                                                                                                                             | Other  | 83 (72, 94)    | 80 (69, 91)    | 44 (35, 53) | 43 (34, 52) |
| Annual wages: 90 <sup>th</sup> percentile                                                                                                   | Asian  | 27 (21, 34)    | 27 (21, 34)    | 14 (10, 18) | 14 (10, 18) |
|                                                                                                                                             | Black  | 87 (78, 96)    | 90 (80, 99)    | 51 (45, 58) | 52 (45, 59) |
|                                                                                                                                             | Latinx | 142 (136, 147) | 129 (123, 134) | 71 (67, 75) | 67 (63, 71) |
|                                                                                                                                             | White  | (ref)          | (ref)          | (ref)       | (ref)       |
|                                                                                                                                             | Other  | 83 (72, 94)    | 80 (70, 91)    | 44 (35, 53) | 43 (34, 52) |

**eTable 6: Estimated COVID-19 Mortality Risks and Percent Change in Mortality Risk After Accounting for Racial and Ethnic Differences in Composition, Education, and Occupational Characteristics, for Individuals Aged 18-65, per 100,000 Persons, by Race, Ethnicity, and Gender, Sensitivity Analysis Results Based on Logistic Regression, California, January 1, 2020-February 12, 2021**

| Gender, race/ethnicity | Unadjusted | Adjusted for composition (95% CI) | Adjusted for composition and work sector (95% CI) | Adjusted for composition and telework (95% CI) | Adjusted for composition- and wages (95% CI) | Adjusted for composition and education (95% CI) | Adjusted for composition and all occupational characteristics (work sector, telework, and wages) (95% CI) | Adjusted for composition, education and all occupational characteristics (work sector, telework, and wages) (95% CI) |
|------------------------|------------|-----------------------------------|---------------------------------------------------|------------------------------------------------|----------------------------------------------|-------------------------------------------------|-----------------------------------------------------------------------------------------------------------|----------------------------------------------------------------------------------------------------------------------|
| Women                  |            |                                   |                                                   |                                                |                                              |                                                 |                                                                                                           |                                                                                                                      |
| Asian                  | 15         | 18 (12, 23)                       | 17 (12, 22)                                       | 16 (12, 21)                                    | 18 (13, 23)                                  | 20 (14, 26)                                     | 17 (-3260, 3294)                                                                                          | 19 (-47, 86)                                                                                                         |
| Black                  | 48         | 51 (42, 60)                       | 52 (38, 66)                                       | 53 (41, 64)                                    | 61 (9, 112)                                  | 49 (29, 70)                                     | 59 (-3090, 3208)                                                                                          | 81 (-14, 176)                                                                                                        |
| Latinx                 | 60         | 63 (60, 67)                       | 63 (60, 67)                                       | 61 (57, 66)                                    | 61 (56, 65)                                  | 47 (44, 50)                                     | 62 (-1971, 2094)                                                                                          | 49 (41, 57)                                                                                                          |
| White                  | 15         | (ref)                             | (ref)                                             | (ref)                                          | (ref)                                        | (ref)                                           | (ref)                                                                                                     | (ref)                                                                                                                |
| Other                  | 29         | 45 (37, 54)                       | 46 (36, 55)                                       | 47 (36, 57)                                    | 45 (35, 54)                                  | 41 (33, 49)                                     | 49 (-2378, 2475)                                                                                          | 47 (36, 57)                                                                                                          |
| Men                    |            |                                   |                                                   |                                                |                                              |                                                 |                                                                                                           |                                                                                                                      |
| Asian                  | 41         | 48 (40, 57)                       | 49 (40, 58)                                       | 48 (40, 57)                                    | 49 (40, 58)                                  | 55 (45, 65)                                     | 49 (39, 59)                                                                                               | 54 (43, 65)                                                                                                          |
| Black                  | 77         | 87 (79, 96)                       | 103 (92, 113)                                     | 101 (91, 112)                                  | 91 (81, 102)                                 | 77 (69, 85)                                     | 97 (84, 109)                                                                                              | 99 (81, 117)                                                                                                         |
| Latinx                 | 138        | 122 (117, 128)                    | 111 (106, 117)                                    | 115 (109, 120)                                 | 111 (105, 116)                               | 100 (95, 106)                                   | 111 (105, 118)                                                                                            | 99 (92, 105)                                                                                                         |
| White                  | 26         | (ref)                             | (ref)                                             | (ref)                                          | (ref)                                        | (ref)                                           | (ref)                                                                                                     | (ref)                                                                                                                |
| Other                  | 57         | 85 (75, 96)                       | 86 (75, 97)                                       | 84 (74, 94)                                    | 83 (72, 94)                                  | 80 (70, 89)                                     | 89 (75, 102)                                                                                              | 88 (75, 100)                                                                                                         |

Legend: “Other” race and ethnicity includes American Indian, Alaskan Native, Native Hawaiians, other Pacific Islanders, multi-race, and unspecified (all non-Latinx). Composition-adjusted COVID-19 mortality risks indicate the estimated COVID-19 mortality risk if all racial/ethnic groups had the same distribution of age, nativity, and region of residence as White people. Composition- and education-, work sector-, telework-, or wages-adjusted COVID-19 mortality risks indicate the estimated COVID-19 mortality risk if all racial/ethnic groups had the same distribution of age, nativity, region of residence, and educational attainment, work sector, telework capacity, or wages as White people, respectively.

## eReferences

- 1 Chen Y-H, Glymour M, Riley A, *et al.* Excess mortality associated with the COVID-19 pandemic among Californians 18–65 years of age, by occupational sector and occupation: March through November 2020. *PLOS ONE* 2021; **16**: e0252454.
- 2 State of California. Essential workforce. 2020. <https://covid19.ca.gov/essential-workforce/> (accessed July 6, 2021).
- 3 Hawkins D. Differential occupational risk for COVID-19 and other infection exposure according to race and ethnicity. *American Journal of Industrial Medicine* 2020; **63**: 817–20.
- 4 Baker MG. Nonrelocatable Occupations at Increased Risk During Pandemics: United States, 2018. *Am J Public Health* 2020; **110**: 1126–32.
- 5 Dingel JI, Neiman B. How many jobs can be done at home? *Journal of Public Economics* 2020; **189**: 104235.
- 6 Baker MG. Who cannot work from home? Characterizing occupations facing increased risk during the COVID-19 pandemic using 2018 BLS data. *medRxiv* 2020; : 2020.03.21.20031336.
- 7 US Census Bureau. 2018 Census Occupation Code List with Crosswalk. 2020; published online Aug 31. <https://www2.census.gov/programs-surveys/demo/guidance/industry-occupation/2018-occupation-code-list-and-crosswalk.xlsx> (accessed July 21, 2021).
- 8 O\*NET Resource Center. Crosswalk O\*NET-SOC 2019 to 2018 SOC - Occupational Listings at O\*NET Resource Center. <https://www.onetcenter.org/taxonomy/2019/soc.html> (accessed July 21, 2021).
- 9 US Bureau of Labor Statistics. Crosswalk from the 2010 SOC to the 2018 SOC. 2017; published online Dec 6. [https://www.bls.gov/soc/2018/soc\\_2010\\_to\\_2018\\_crosswalk.xlsx](https://www.bls.gov/soc/2018/soc_2010_to_2018_crosswalk.xlsx) (accessed July 21, 2021).
- 10 O\*NET Resource Center. Updating the O\*NET-SOC Taxonomy: Incorporating the 2010 SOC Structure at O\*NET Resource Center. 2010; published online Dec. <https://www.onetcenter.org/reports/Taxonomy2010.html> (accessed July 21, 2021).
- 11 US Bureau of Labor Statistics. OES 2019 Hybrid Structure. 2020; published online March 31. [https://www.bls.gov/oes/oes\\_2019\\_hybrid\\_structure.xlsx](https://www.bls.gov/oes/oes_2019_hybrid_structure.xlsx).
- 12 Efron B, Tibshirani R. Bootstrap Methods for Standard Errors, Confidence Intervals, and Other Measures of Statistical Accuracy. *Statistical Science* 1986; **1**: 54–75.
